## Expression of Concern

# Expression of Concern: LncRNA DQ786243 contributes to proliferation and metastasis of colorectal cancer both *in vitro* and *in vivo*

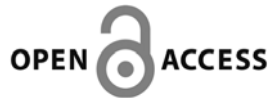

The Editorial Office has been made aware of potential issues surrounding the scientific validity of this paper, hence has issued an expression of concern to notify readers whilst the Editorial Office investigates.

Downloaded from [http://port.silverchair.com/bioscience/article-pdf/41/4/BSR-20160048\\_EOC/906858/bsr-2016-0048\\_eoc.pdf](http://port.silverchair.com/bioscience/article-pdf/41/4/BSR-20160048_EOC/906858/bsr-2016-0048_eoc.pdf) by guest on 09 April 2024

Version of Record published:  
06 April 2021
